# Supplementary material
Source: Springer Nature journal article supplement (https://www.springermedizin.de/resource/supplementary/13756_2011_9_MOESM1_ESM.pdf/9682220)
Supplement: MOESM1 [file 9682220]

# Oral Antibiotic Scripts/1000 Population 1995-2010\*

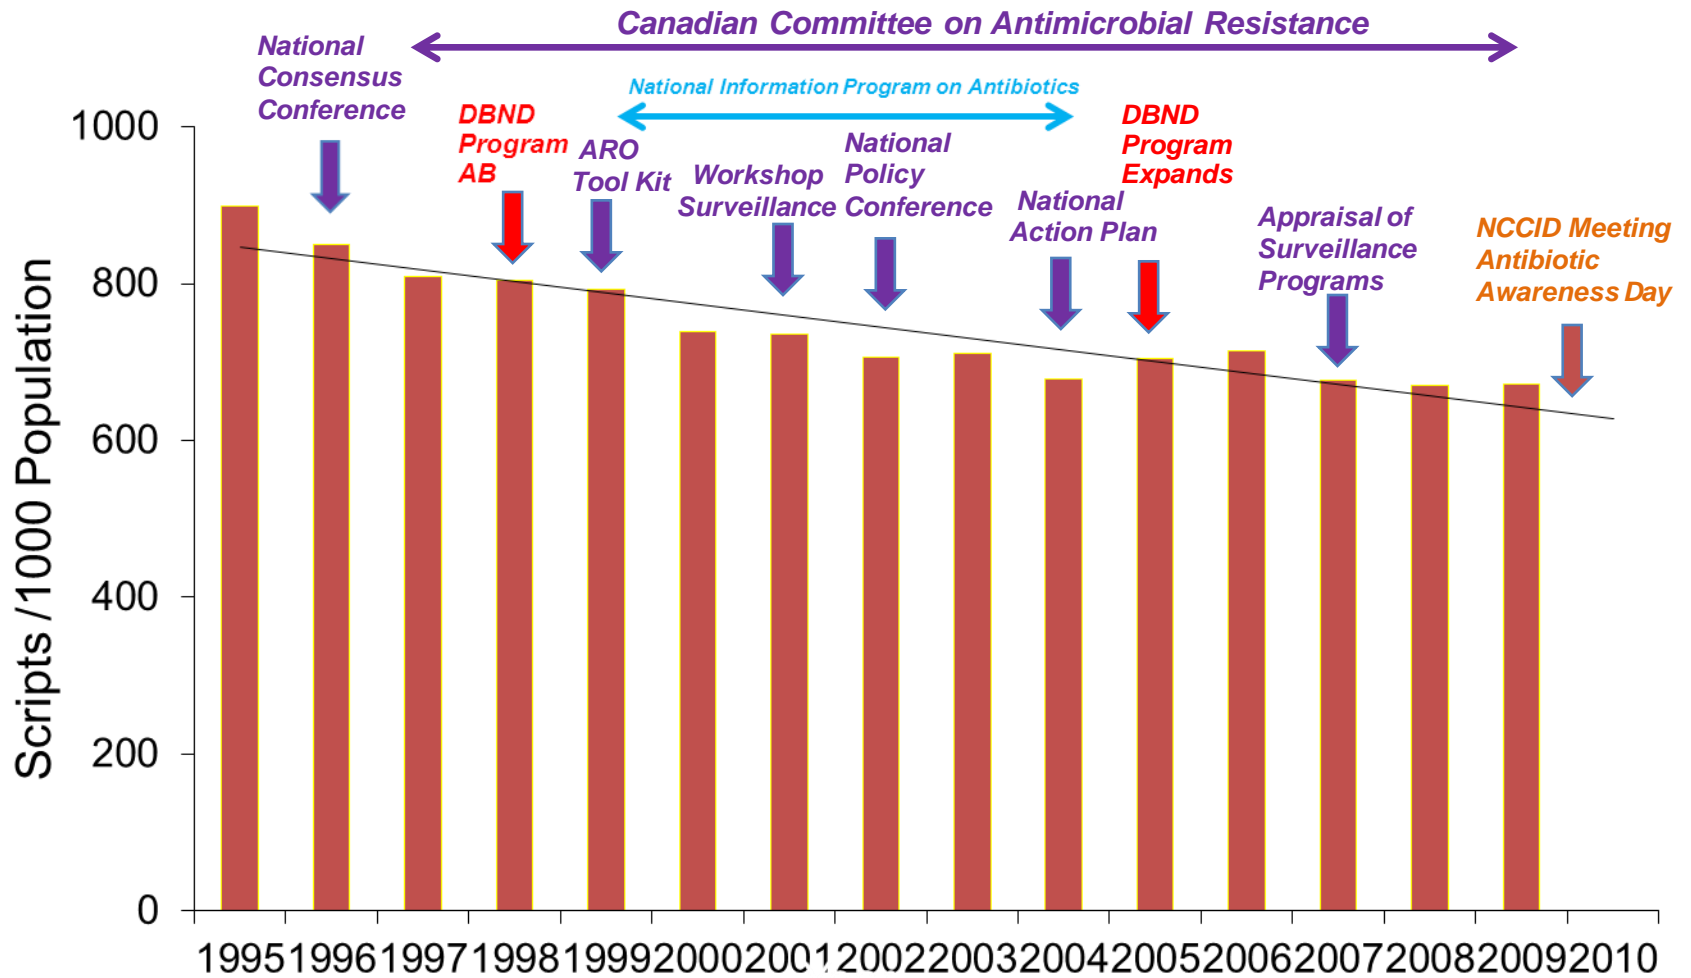

\*Data from IMS Health Canada provided to CCAR and CIPARS  
Population data from Statistics Canada
